# Supplementary material for: Performance Evaluation of Multi-Typed Precipitation Products for Agricultural Research in the Amur River Basin over the Sino–Russian Border Region
Source: MDPI journal article supplement (doi:10.3390/rs15102577), 2023-05-15
Supplement: s1 [file s1]

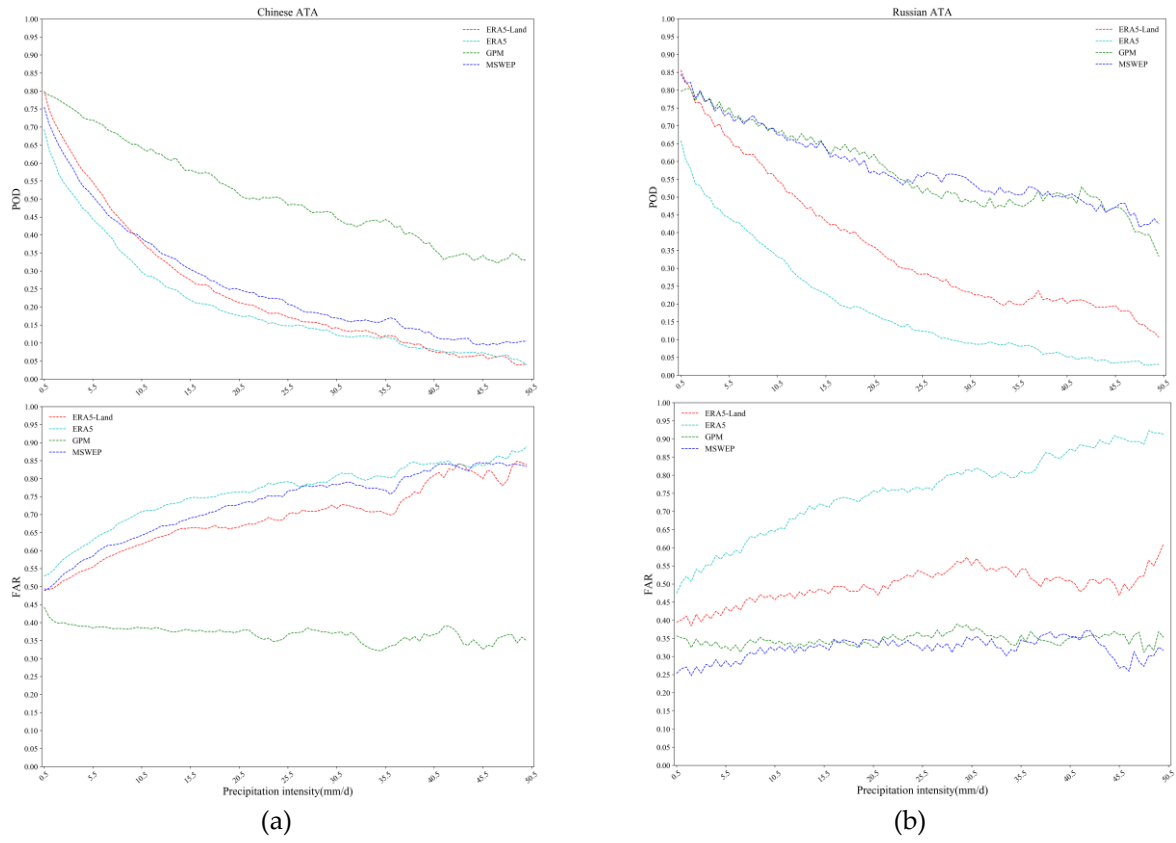

**Figure S1.** Assessment of different precipitation intensities among the Chinese (a) and Russian (b) ATAs based on the POD and FAR.

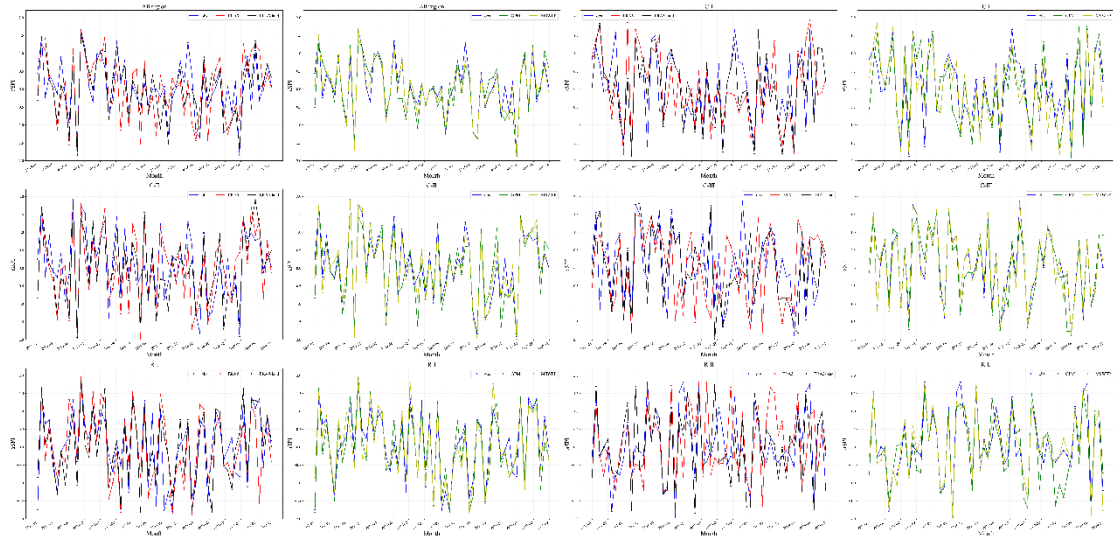

**Figure S2.** Spatial patterns of the aSPI-1 averaged by MP from 2015 to 2019 in the ATAs.

**Table S1.** The detailed information of selected station.

| <b>Part 1 the detailed information of selected station (Chinese part)</b> |                     |                      |                       |                                                                 |
|---------------------------------------------------------------------------|---------------------|----------------------|-----------------------|-----------------------------------------------------------------|
| <b>Station index</b>                                                      | <b>Latitude (°)</b> | <b>Longitude (°)</b> | <b>Farming region</b> | <b>National agrometeorological station</b>                      |
| 50136                                                                     | 122.533             | 52.967               | C-1                   |                                                                 |
| 50353                                                                     | 126.633             | 51.733               | C-2                   |                                                                 |
| 50434                                                                     | 121.7               | 50.45                | C-1                   |                                                                 |
| 50468                                                                     | 127.45              | 50.25                | C-2                   |                                                                 |
| 50527                                                                     | 119.7               | 49.25                | C-2                   |                                                                 |
| 50548                                                                     | 123.717             | 49.2                 | C-3                   |                                                                 |
| 50557                                                                     | 125.233             | 49.167               | C-3                   | √                                                               |
| 50564                                                                     | 127.35              | 49.433               | C-2                   | √                                                               |
| 50603                                                                     | 116.817             | 48.683               | C-2                   |                                                                 |
| 50658                                                                     | 125.883             | 48.05                | C-3                   |                                                                 |
| 50727                                                                     | 119.933             | 47.167               | C-2                   |                                                                 |
| 50745                                                                     | 123.918             | 47.24                | C-3                   |                                                                 |
| 50756                                                                     | 126.867             | 47.45                | C-3                   | √                                                               |
| 50774                                                                     | 128.833             | 47.7                 | C-2                   |                                                                 |
| 50788                                                                     | 131.983             | 47.233               | C-4                   | √                                                               |
| 50844                                                                     | 123.45              | 46.4                 | C-2                   |                                                                 |
| 50854                                                                     | 125.317             | 46.383               | C-2                   |                                                                 |
| 50888                                                                     | 132.183             | 46.317               | C-4                   | √                                                               |
| 50949                                                                     | 124.867             | 45.083               | C-3                   |                                                                 |
| 50953                                                                     | 126.567             | 45.933               | C-3                   |                                                                 |
| 50963                                                                     | 128.733             | 45.967               | C-3                   | √                                                               |
| 50968                                                                     | 127.967             | 45.217               | C-3                   |                                                                 |
| 50978                                                                     | 130.917             | 45.3                 | C-3                   |                                                                 |
| 50983                                                                     | 132.967             | 45.767               | C-4                   |                                                                 |
| 54094                                                                     | 129.667             | 44.5                 | C-2                   | √                                                               |
| 54161                                                                     | 125.681             | 43.996               | C-3                   | √                                                               |
| 54186                                                                     | 128.2               | 43.367               | C-2                   |                                                                 |
| 54273                                                                     | 126.75              | 42.983               | C-4                   | √                                                               |
| <b>Part 2 the detailed information of selected station (Russian part)</b> |                     |                      |                       |                                                                 |
| <b>Station index</b>                                                      | <b>Latitude (°)</b> | <b>Longitude (°)</b> | <b>Farming region</b> | <b>Deploy in perennial farmland and with fully data records</b> |
| 30499                                                                     | 124.667             | 55.183               | R-1                   |                                                                 |
| 30683                                                                     | 121.933             | 53.967               | R-1                   |                                                                 |
| 31253                                                                     | 128.867             | 54.717               | R-1                   |                                                                 |
| 31295                                                                     | 125.817             | 53.467               | R-1                   |                                                                 |
| 31300                                                                     | 127.3               | 53.7                 | R-1                   |                                                                 |

---

|       |         |        |     |   |
|-------|---------|--------|-----|---|
| 31329 | 132.933 | 53.067 | R-1 |   |
| 31371 | 126     | 52.783 | R-1 |   |
| 31388 | 129.917 | 52.35  | R-1 |   |
| 31445 | 128.117 | 51.45  | R-2 |   |
| 31510 | 127.483 | 50.283 | R-4 | √ |
| 31527 | 129.467 | 50.117 | R-3 |   |
| 31587 | 128.65  | 49.617 | R-3 |   |
| 31594 | 130.083 | 49.417 | R-3 | √ |
| 31702 | 131.083 | 49     | R-3 |   |
| 31707 | 130.967 | 47.733 | R-4 | √ |
| 31713 | 132.95  | 48.733 | R-3 |   |
| 31725 | 133.833 | 48.617 | R-3 |   |
| 31845 | 135.317 | 46.533 | R-3 |   |
| 31873 | 133.733 | 45.867 | R-4 | √ |
| 31915 | 131.383 | 44.4   | R-5 | √ |
| 31921 | 132.067 | 44.717 | R-4 |   |
| 31981 | 133.067 | 43.967 | R-5 |   |

---
