# Supplementary figures and images for: Performance Evaluation of Multi-Typed Precipitation Products for Agricultural Research in the Amur River Basin over the Sino–Russian Border Region
Source: MDPI journal article supplement (doi:10.3390/rs15102577), 2023-05-15

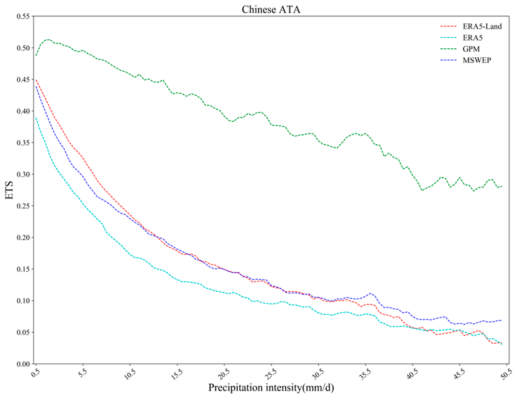

(a)

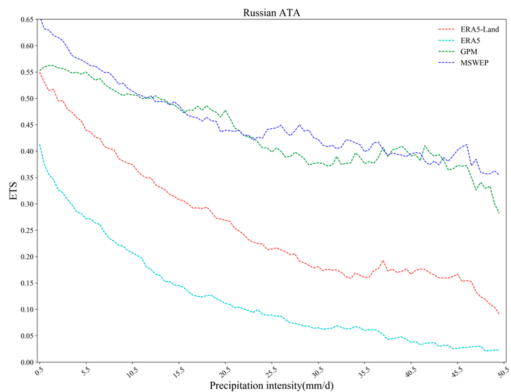

(b)

Supplement: s1 [file s1]

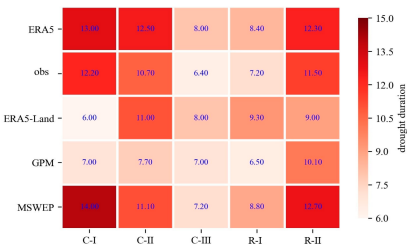

(a)

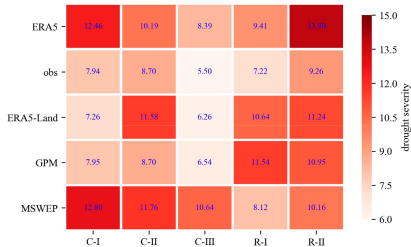

(b)

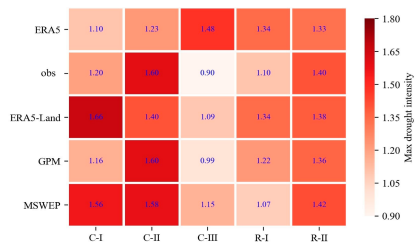

(c)

Supplement: s1 [file s1]

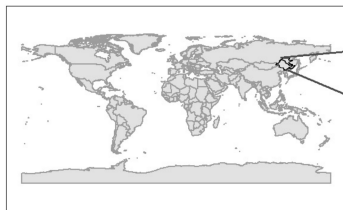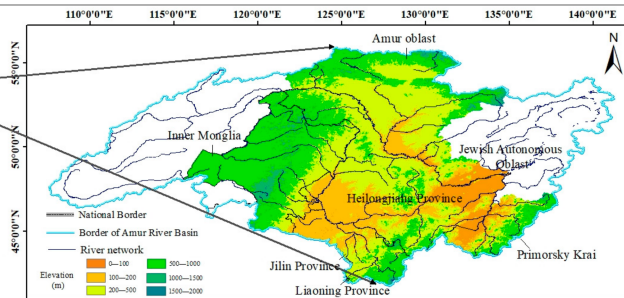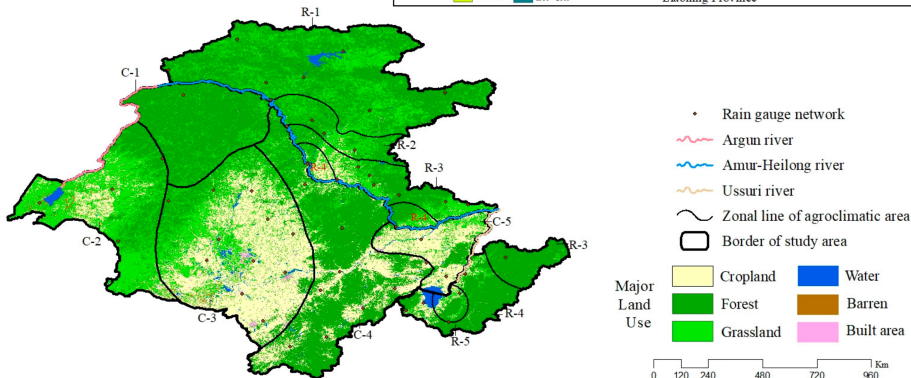

Supplement: s1 [file s1]

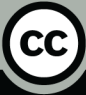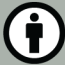

BY

Supplement: s1 [file s1]

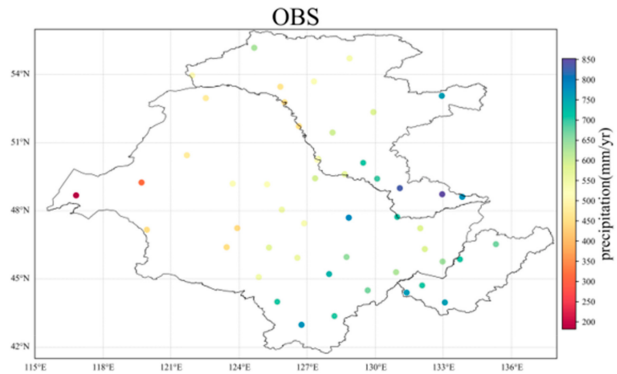

(a)

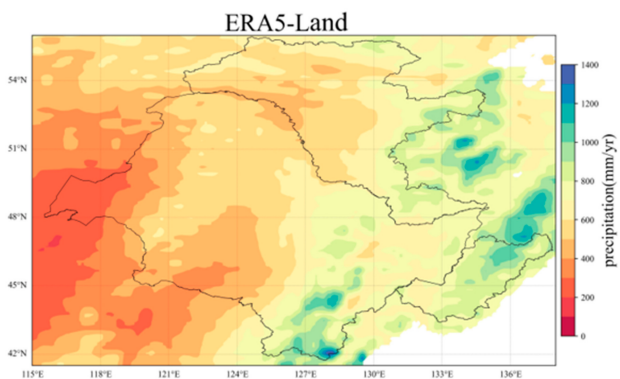

(b)

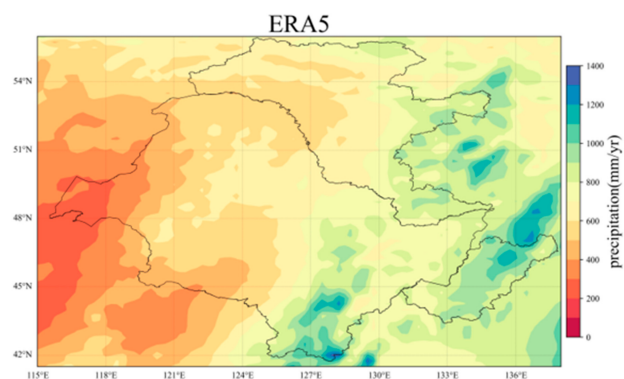

(c)

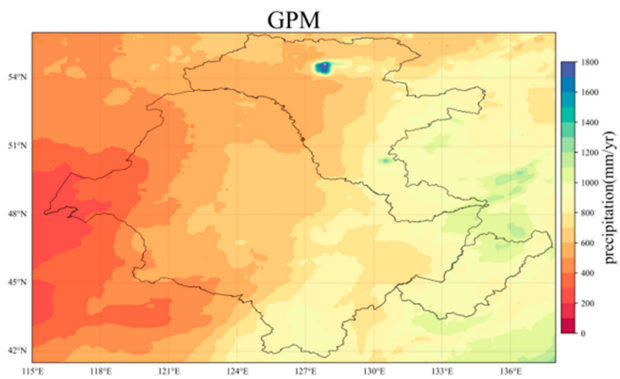

(d)

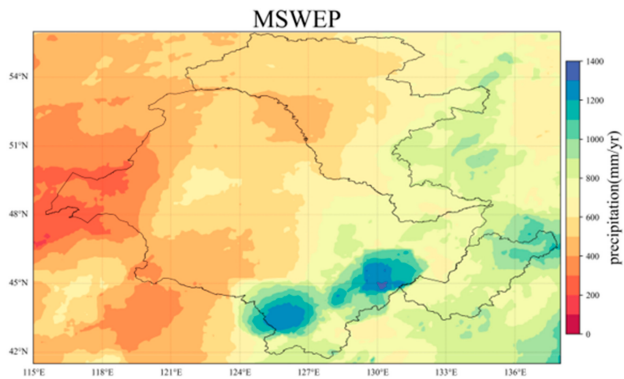

(e)

Supplement: s1 [file s1]

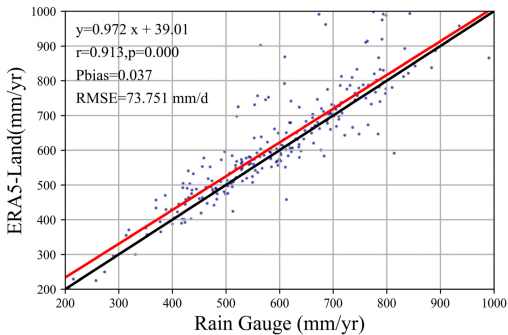

(a)

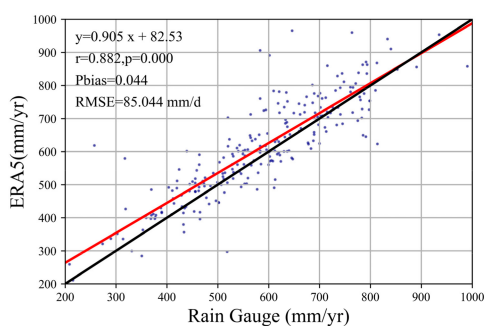

(b)

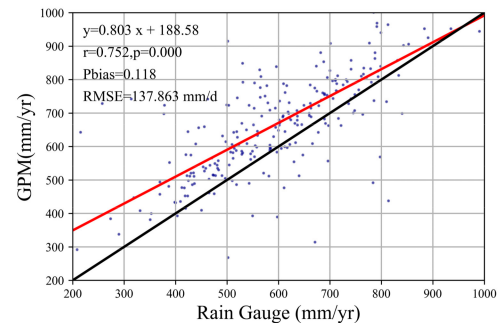

(c)

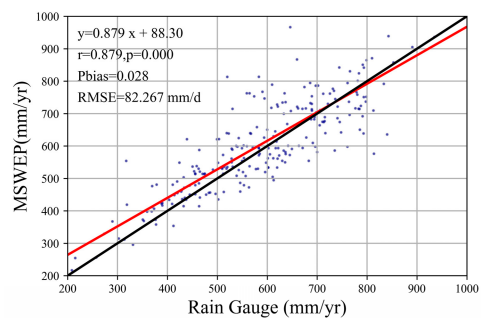

(d)

Supplement: s1 [file s1]

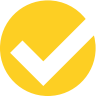

check for  
updates

Supplement: s1 [file s1]

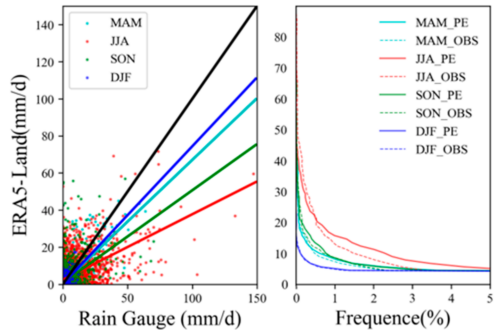

(a)

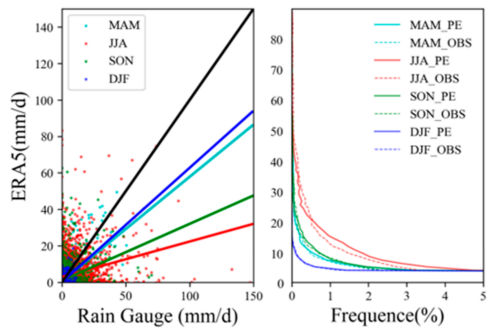

(b)

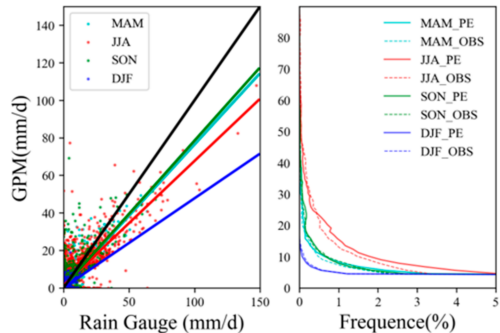

(c)

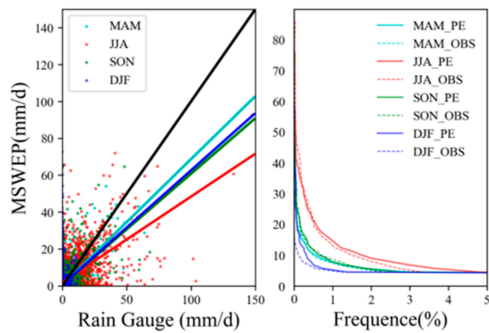

(d)

Supplement: s1 [file s1]

PDF in all regions

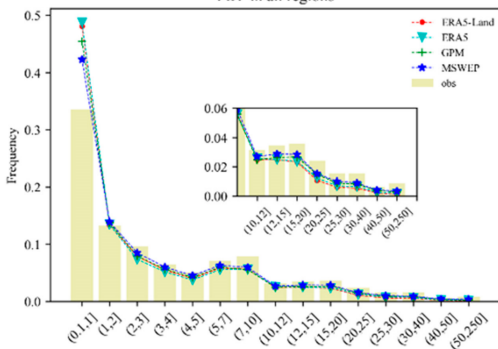

(a)

PDF in C-II

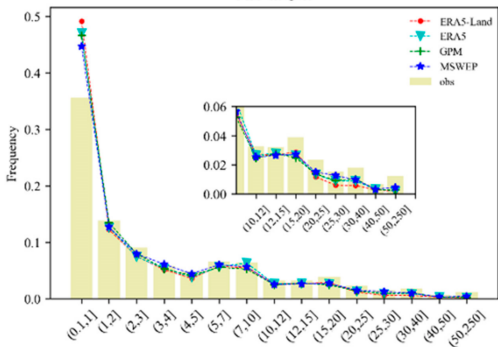

(b)

PDF in C-III

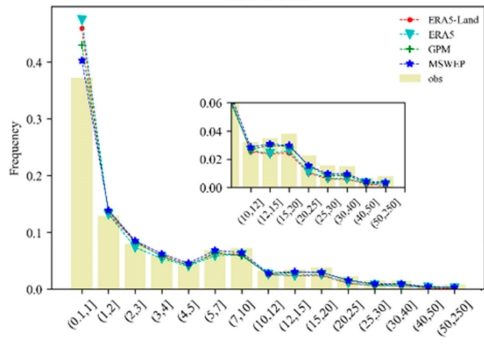

(c)

PDF in R-I

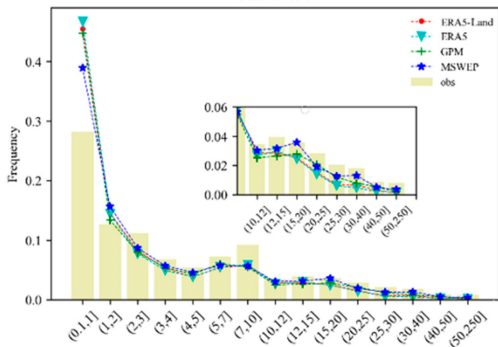

(d)

PDF in R-II

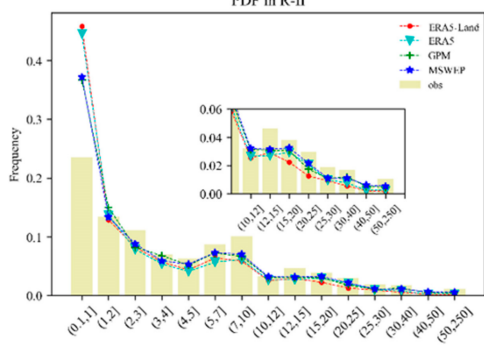

(e)

(f)

Supplement: s1 [file s1]

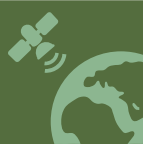

*remote sensing*

Supplement: s1 [file s1]

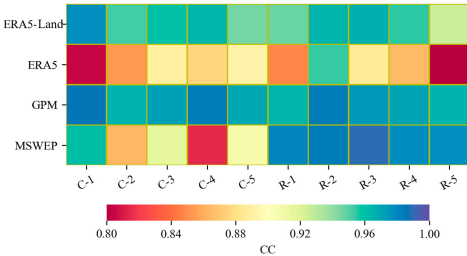

(a)

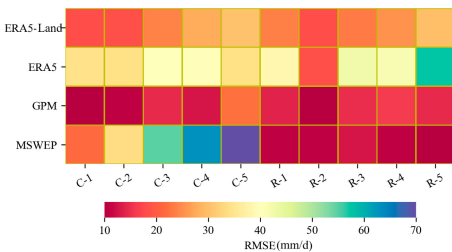

(b)

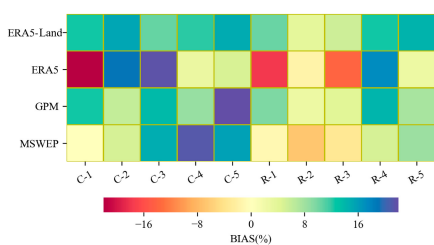

(c)

Supplement: s1 [file s1]

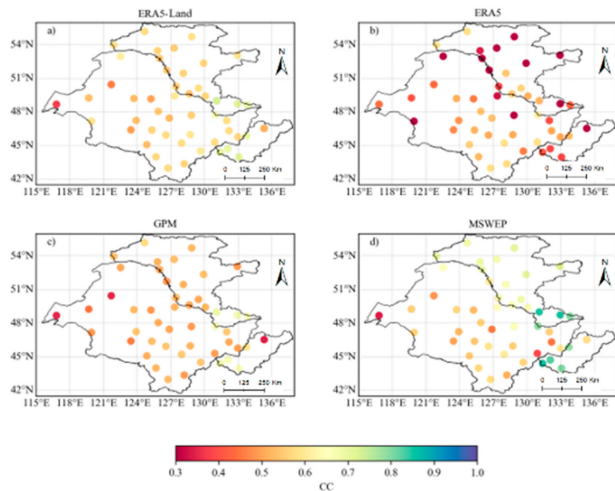

(a)

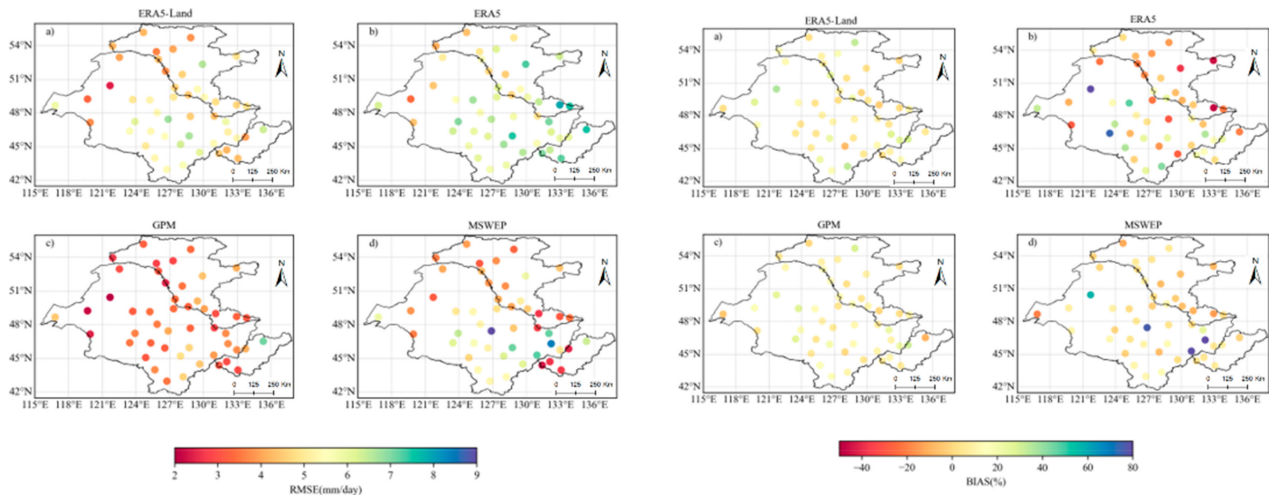

(b)

(c)

Supplement: s1 [file s1]
